# Supplementary material for: Waist circumference, waist‐to‐height ratio and BMI percentiles in children aged 5 to 19 years in India: A population‐based study
Source: PubMed Central journal article supplement (PMC8346379; doi:10.1002/osp4.493), 2021-03-23
Supplement: OSP4-7-392-s001.pdf [file OSP4-7-392-s001.pdf]

## APPENDIX TABLES AND FIGURES

Appendix Table 1: Characteristics of a population-based sample of children and adolescents 5-19 years in India (2016-18)

| Characteristics | weight (kg)  |                    | Height (cm)  |                     | Waist circumference (cm) |                   | Waist circumference height ratio |                    | Body mass index |                   |
|-----------------|--------------|--------------------|--------------|---------------------|--------------------------|-------------------|----------------------------------|--------------------|-----------------|-------------------|
|                 | (n)          | Mean (SD)          | (n)          | Mean (SD)           | (n)                      | Mean (SD)         | (n)                              | Mean (SD)          | (n)             | Mean (SD)         |
| <b>Boys</b>     | <b>35390</b> | <b>33.0 (14.4)</b> | <b>35449</b> | <b>139.6 (20.9)</b> | <b>35449</b>             | <b>59.0 (8.9)</b> | <b>35449</b>                     | <b>0.42 (0.04)</b> | <b>35130</b>    | <b>16.0 (2.9)</b> |
| 5               | 3624         | 16.4(6.3)          | 3640         | 106.6(6.2)          | 3640                     | 49.8(3.6)         | 3640                             | 0.47(0.04)         | 3582            | 14.0(1.4)         |
| 6               | 3839         | 17.8(3.7)          | 3848         | 112.5(6.7)          | 3848                     | 50.6(3.8)         | 3848                             | 0.45(0.04)         | 3796            | 14.0(1.5)         |
| 7               | 3869         | 19.9(4.9)          | 3872         | 118.5(6.8)          | 3872                     | 52.1(4.4)         | 3872                             | 0.44(0.03)         | 3831            | 14.1(1.5)         |
| 8               | 4117         | 21.9(4.5)          | 4126         | 123.5(7.4)          | 4126                     | 53.2(4.8)         | 4126                             | 0.43(0.04)         | 4081            | 14.3(1.8)         |
| 9               | 3585         | 24.5(6.6)          | 3589         | 128.6(7.6)          | 3589                     | 54.9(5.4)         | 3589                             | 0.43(0.04)         | 3556            | 14.6(2.0)         |
| 10              | 1837         | 27.1(7.3)          | 1838         | 133.5(7.4)          | 1838                     | 56.4(5.6)         | 1838                             | 0.42(0.04)         | 1821            | 15.0(2.1)         |
| 11              | 1766         | 29.8(6.9)          | 1769         | 138.6(8.3)          | 1769                     | 58.1(6.7)         | 1769                             | 0.42(0.04)         | 1754            | 15.4(2.5)         |
| 12              | 1867         | 32.7(7.7)          | 1868         | 143.3(9.6)          | 1868                     | 59.3(6.3)         | 1868                             | 0.41(0.04)         | 1854            | 15.8(2.3)         |
| 13              | 1819         | 37.0(8.9)          | 1821         | 149.5(9.4)          | 1821                     | 61.6(7.3)         | 1821                             | 0.41(0.04)         | 1816            | 16.4(2.6)         |
| 14              | 1860         | 41.3(9.0)          | 1860         | 155.4(9.6)          | 1860                     | 63.0(6.8)         | 1860                             | 0.41(0.04)         | 1851            | 17.0(2.5)         |
| 15              | 1865         | 45.6(9.6)          | 1868         | 159.7(8.8)          | 1868                     | 64.8(7.2)         | 1868                             | 0.41(0.04)         | 1860            | 17.7(2.7)         |
| 16              | 1765         | 48.7(9.4)          | 1766         | 162.9(8.0)          | 1766                     | 66.6(8.1)         | 1766                             | 0.41(0.05)         | 1759            | 18.3(2.9)         |
| 17              | 1558         | 51.5(9.0)          | 1562         | 164.4(7.4)          | 1562                     | 68.1(7.5)         | 1562                             | 0.41(0.04)         | 1555            | 19.0(2.8)         |
| 18              | 1801         | 52.7(9.2)          | 1803         | 165.3(7.2)          | 1803                     | 69.2(7.3)         | 1803                             | 0.42(0.04)         | 1797            | 19.2(2.7)         |
| 19              | 218          | 52.6(8.3)          | 219          | 164.1(7.2)          | 219                      | 70.1(7.0)         | 219                              | 0.43(0.04)         | 217             | 19.5(2.5)         |
| <b>Girls</b>    | <b>32766</b> | <b>32.1 (12.5)</b> | <b>32812</b> | <b>136.2 (17.5)</b> | <b>32812</b>             | <b>58.0 (8.4)</b> | <b>32812</b>                     | <b>0.43 (0.04)</b> | <b>32611</b>    | <b>16.3 (3.2)</b> |
| 5               | 3476         | 15.5(2.9)          | 3486         | 105.7(6.8)          | 3486                     | 48.8(3.6)         | 3486                             | 0.46(0.04)         | 3455            | 13.8(1.4)         |
| 6               | 3635         | 17.2(3.4)          | 3642         | 111.4(6.6)          | 3642                     | 49.9(3.8)         | 3642                             | 0.45(0.04)         | 3610            | 13.8(1.5)         |
| 7               | 3556         | 19.2(3.9)          | 3565         | 117.5(6.7)          | 3565                     | 50.9(4.0)         | 3565                             | 0.43(0.03)         | 3525            | 13.8(1.6)         |
| 8               | 3642         | 21.5(5.2)          | 3646         | 122.5(7.3)          | 3646                     | 52.4(5.5)         | 3646                             | 0.43(0.04)         | 3619            | 14.2(1.8)         |
| 9               | 3046         | 23.8(4.9)          | 3049         | 127.8(7.6)          | 3049                     | 53.9(5.5)         | 3049                             | 0.42(0.04)         | 3032            | 14.5(2.0)         |
| 10              | 1612         | 26.8(5.9)          | 1613         | 133.3(8.4)          | 1613                     | 55.8(5.7)         | 1613                             | 0.42(0.04)         | 1604            | 15.0(2.2)         |
| 11              | 1686         | 30.2(7.0)          | 1686         | 138.7(8.1)          | 1686                     | 57.3(6.4)         | 1686                             | 0.41(0.04)         | 1683            | 15.6(2.5)         |
| 12              | 1777         | 34.0(8.2)          | 1777         | 143.4(8.0)          | 1777                     | 59.5(6.3)         | 1777                             | 0.42(0.04)         | 1769            | 16.3(2.6)         |
| 13              | 1714         | 37.8(8.7)          | 1718         | 147.1(7.6)          | 1718                     | 61.5(7.0)         | 1718                             | 0.42(0.04)         | 1708            | 17.4(2.9)         |
| 14              | 1661         | 41.7(9.3)          | 1663         | 150.7(6.5)          | 1663                     | 63.9(7.6)         | 1663                             | 0.42(0.05)         | 1656            | 18.3(3.1)         |
| 15              | 1874         | 42.1(6.7)          | 1876         | 151.7(6.1)          | 1876                     | 63.4(6.3)         | 1876                             | 0.42(0.04)         | 1868            | 18.3(2.6)         |
| 16              | 1751         | 43.7(6.9)          | 1752         | 152.5(6.0)          | 1752                     | 64.3(6.3)         | 1752                             | 0.42(0.04)         | 1749            | 18.8(2.6)         |
| 17              | 1553         | 44.8(8.2)          | 1556         | 152.7(6.0)          | 1556                     | 65.7(7.4)         | 1556                             | 0.43(0.05)         | 1551            | 19.2(3.1)         |
| 18              | 1568         | 44.8(7.1)          | 1568         | 152.3(5.8)          | 1568                     | 65.4(6.8)         | 1568                             | 0.43(0.04)         | 1567            | 19.3(2.7)         |
| 19              | 215          | 44.2(7.9)          | 215          | 151.2(5.8)          | 215                      | 64.7(6.9)         | 215                              | 0.43(0.04)         | 215             | 19.3(2.9)         |
| <b>Total</b>    | <b>68156</b> | <b>32.3 (13.5)</b> | <b>68261</b> | <b>137.9 (19.4)</b> | <b>68261</b>             | <b>58.5 (8.7)</b> | <b>68261</b>                     | <b>0.43 (0.04)</b> | <b>67741</b>    | <b>16.2 (3.1)</b> |
| 5               | 7100         | 16.0(4.9)          | 7126         | 106.2(6.5)          | 7126                     | 49.3(3.6)         | 7126                             | 0.47(0.04)         | 7037            | 13.9(1.4)         |
| 6               | 7474         | 17.5(3.6)          | 7490         | 112.0(6.7)          | 7490                     | 50.3(3.8)         | 7490                             | 0.45(0.04)         | 7406            | 13.9(1.5)         |
| 7               | 7425         | 19.5(4.4)          | 7437         | 117.9(6.8)          | 7437                     | 51.4(4.3)         | 7437                             | 0.44(0.03)         | 7356            | 14.0(1.5)         |

|           |      |           |      |            |      |           |      |            |      |           |
|-----------|------|-----------|------|------------|------|-----------|------|------------|------|-----------|
| <b>8</b>  | 7759 | 21.7(4.8) | 7772 | 123.0(7.3) | 7772 | 52.8(5.2) | 7772 | 0.43(0.04) | 7700 | 14.2(1.8) |
| <b>9</b>  | 6631 | 24.2(5.8) | 6638 | 128.2(7.6) | 6638 | 54.4(5.5) | 6638 | 0.42(0.04) | 6588 | 14.6(2.0) |
| <b>10</b> | 3449 | 26.9(6.6) | 3451 | 133.4(7.9) | 3451 | 56.1(5.7) | 3451 | 0.42(0.04) | 3425 | 15.0(2.1) |
| <b>11</b> | 3452 | 30.0(7.0) | 3455 | 138.6(8.2) | 3455 | 57.7(6.6) | 3455 | 0.42(0.04) | 3437 | 15.5(2.5) |
| <b>12</b> | 3644 | 33.3(7.9) | 3645 | 143.3(8.9) | 3645 | 59.4(6.3) | 3645 | 0.41(0.04) | 3623 | 16.1(2.5) |
| <b>13</b> | 3533 | 37.4(8.8) | 3539 | 148.3(8.7) | 3539 | 61.6(7.2) | 3539 | 0.42(0.04) | 3524 | 16.9(2.8) |
| <b>14</b> | 3521 | 41.5(9.1) | 3523 | 153.0(8.5) | 3523 | 63.4(7.2) | 3523 | 0.42(0.05) | 3507 | 17.7(2.9) |
| <b>15</b> | 3739 | 43.7(8.3) | 3744 | 155.4(8.4) | 3744 | 64.0(6.8) | 3744 | 0.41(0.04) | 3728 | 18.1(2.7) |
| <b>16</b> | 3516 | 46.2(8.6) | 3518 | 157.6(8.7) | 3518 | 65.4(7.3) | 3518 | 0.42(0.04) | 3508 | 18.6(2.8) |
| <b>17</b> | 3111 | 48.0(9.2) | 3118 | 158.2(8.9) | 3118 | 66.8(7.6) | 3118 | 0.42(0.05) | 3106 | 19.1(3.0) |
| <b>18</b> | 3369 | 48.9(9.1) | 3371 | 159.0(9.3) | 3371 | 67.3(7.3) | 3371 | 0.42(0.04) | 3364 | 19.3(2.7) |
| <b>19</b> | 433  | 48.4(9.1) | 434  | 157.8(9.2) | 434  | 67.5(7.4) | 434  | 0.43(0.04) | 432  | 19.4(2.7) |

For Review Only

Appendix Figure 1: Smoothed waist circumference (WC) and BMI percentiles curves for males and females aged 5-19 years based on a "Reference" population in analytical sample 2 (removing  $\pm 3SD$  BMI z scores)

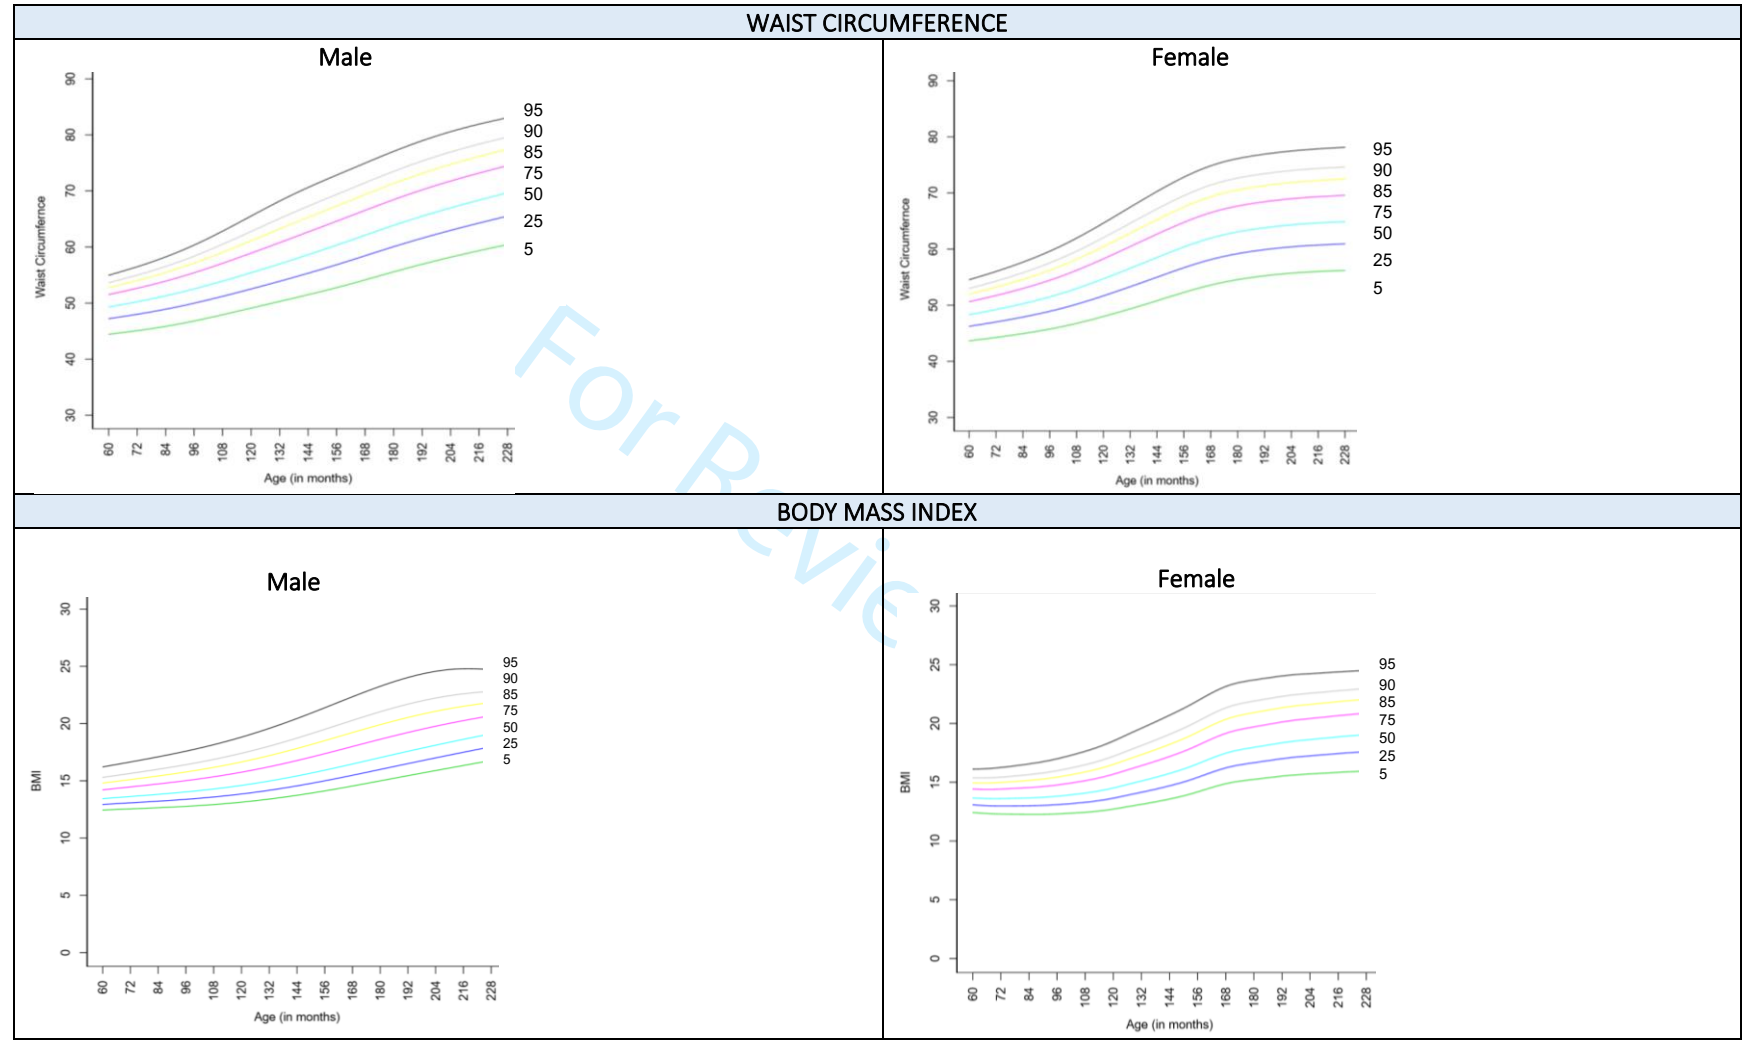

Excluded sample: 7.7% of boys and 4.1% of girls were thin (BMI < -3SD). Similarly, 0.1% of boys and 0.2% of girls were obese (BMI > -3SD).

| WAIST CIRCUMFERENCE (WC)<br>(N=64,262) |         |        |       |       |       |       |       |       |       |       |         |        |       |       |       |       |       |       |       |       |
|----------------------------------------|---------|--------|-------|-------|-------|-------|-------|-------|-------|-------|---------|--------|-------|-------|-------|-------|-------|-------|-------|-------|
| Age (Years)                            | Males   |        |       |       |       |       |       |       |       |       | Females |        |       |       |       |       |       |       |       |       |
|                                        | L       | M      | S     | P5    | P25   | P50   | P75   | P85   | P90   | P95   | L       | M      | S     | P5    | P25   | P50   | P75   | P85   | P90   | P95   |
| 5                                      | -0.445  | 49.306 | 0.065 | 44.45 | 47.22 | 49.31 | 51.52 | 52.77 | 53.64 | 54.97 | -1.665  | 48.310 | 0.067 | 43.67 | 46.25 | 48.31 | 50.63 | 52.01 | 52.99 | 54.56 |
| 6                                      | -0.707  | 50.237 | 0.068 | 45.08 | 48.01 | 50.24 | 52.65 | 54.02 | 54.99 | 56.48 | -1.658  | 49.228 | 0.071 | 44.26 | 47.02 | 49.23 | 51.73 | 53.23 | 54.31 | 56.02 |
| 7                                      | -1.040  | 51.294 | 0.072 | 45.85 | 48.91 | 51.29 | 53.93 | 55.45 | 56.54 | 58.23 | -1.650  | 50.269 | 0.075 | 44.95 | 47.89 | 50.27 | 52.99 | 54.61 | 55.79 | 57.67 |
| 8                                      | -1.475  | 52.530 | 0.076 | 46.82 | 49.99 | 52.53 | 55.42 | 57.14 | 58.38 | 60.35 | -1.643  | 51.489 | 0.079 | 45.76 | 48.92 | 51.49 | 54.45 | 56.24 | 57.54 | 59.62 |
| 9                                      | -1.942  | 53.923 | 0.080 | 47.93 | 51.21 | 53.92 | 57.11 | 59.06 | 60.50 | 62.84 | -1.636  | 52.972 | 0.084 | 46.77 | 50.18 | 52.97 | 56.22 | 58.19 | 59.63 | 61.95 |
| 10                                     | -2.290  | 55.419 | 0.085 | 49.11 | 52.52 | 55.42 | 58.91 | 61.12 | 62.78 | 65.53 | -1.628  | 54.709 | 0.089 | 47.99 | 51.67 | 54.71 | 58.27 | 60.44 | 62.04 | 64.63 |
| 11                                     | -2.415  | 56.989 | 0.089 | 50.30 | 53.90 | 56.99 | 60.79 | 63.22 | 65.08 | 68.20 | -1.621  | 56.589 | 0.093 | 49.36 | 53.31 | 56.59 | 60.46 | 62.85 | 64.61 | 67.48 |
| 12                                     | -2.316  | 58.632 | 0.092 | 51.50 | 55.33 | 58.63 | 62.69 | 65.30 | 67.28 | 70.63 | -1.614  | 58.515 | 0.096 | 50.81 | 55.01 | 58.52 | 62.68 | 65.25 | 67.16 | 70.28 |
| 13                                     | -2.113  | 60.340 | 0.094 | 52.76 | 56.84 | 60.34 | 64.61 | 67.33 | 69.38 | 72.83 | -1.606  | 60.376 | 0.098 | 52.28 | 56.69 | 60.38 | 64.77 | 67.49 | 69.51 | 72.82 |
| 14                                     | -1.950  | 62.112 | 0.096 | 54.14 | 58.45 | 62.11 | 66.55 | 69.35 | 71.46 | 74.97 | -1.599  | 61.951 | 0.099 | 53.59 | 58.14 | 61.95 | 66.49 | 69.31 | 71.41 | 74.84 |
| 15                                     | -1.858  | 63.863 | 0.096 | 55.58 | 60.06 | 63.86 | 68.45 | 71.33 | 73.49 | 77.06 | -1.591  | 63.060 | 0.099 | 54.56 | 59.19 | 63.06 | 67.67 | 70.53 | 72.65 | 76.13 |
| 16                                     | -1.776  | 65.493 | 0.097 | 56.93 | 61.57 | 65.49 | 70.19 | 73.13 | 75.33 | 78.95 | -1.583  | 63.801 | 0.098 | 55.24 | 59.90 | 63.80 | 68.43 | 71.31 | 73.43 | 76.92 |
| 17                                     | -1.680  | 66.985 | 0.097 | 58.19 | 62.97 | 66.99 | 71.77 | 74.74 | 76.95 | 80.57 | -1.576  | 64.322 | 0.098 | 55.71 | 60.40 | 64.32 | 68.97 | 71.85 | 73.99 | 77.48 |
| 18                                     | -1.537  | 68.370 | 0.096 | 59.36 | 64.28 | 68.37 | 73.19 | 76.16 | 78.35 | 81.92 | -1.568  | 64.660 | 0.098 | 56.01 | 60.72 | 64.66 | 69.33 | 72.22 | 74.36 | 77.86 |
| 19                                     | -1.344  | 69.682 | 0.095 | 60.45 | 65.52 | 69.68 | 74.52 | 77.46 | 79.61 | 83.07 | -1.561  | 64.891 | 0.098 | 56.20 | 60.93 | 64.89 | 69.58 | 72.48 | 74.63 | 78.14 |
| BODY MASS INDEX (BMI)<br>(N= 64,262)   |         |        |       |       |       |       |       |       |       |       |         |        |       |       |       |       |       |       |       |       |
| Age (Years)                            | Males   |        |       |       |       |       |       |       |       |       | Females |        |       |       |       |       |       |       |       |       |
|                                        | L       | M      | S     | P5    | P25   | P50   | P75   | P85   | P90   | P95   | L       | M      | S     | P5    | P25   | P50   | P75   | P85   | P90   | P95   |
| 5                                      | -11.073 | 13.748 | 0.103 | 12.45 | 12.94 | 13.45 | 14.21 | 14.80 | 15.30 | 16.22 | -4.395  | 13.662 | 0.072 | 12.42 | 13.07 | 13.66 | 14.42 | 14.95 | 15.36 | 16.12 |
| 6                                      | -10.551 | 14.008 | 0.118 | 12.55 | 13.08 | 13.63 | 14.47 | 15.11 | 15.65 | 16.65 | -4.197  | 13.606 | 0.077 | 12.30 | 12.98 | 13.60 | 14.42 | 14.98 | 15.43 | 16.26 |
| 7                                      | -10.029 | 14.276 | 0.133 | 12.65 | 13.23 | 13.82 | 14.73 | 15.43 | 16.01 | 17.10 | -3.999  | 13.669 | 0.082 | 12.27 | 13.00 | 13.67 | 14.55 | 15.16 | 15.65 | 16.56 |
| 8                                      | -9.506  | 14.562 | 0.147 | 12.77 | 13.39 | 14.03 | 15.02 | 15.78 | 16.41 | 17.59 | -3.802  | 13.810 | 0.088 | 12.31 | 13.09 | 13.81 | 14.76 | 15.43 | 15.98 | 17.00 |
| 9                                      | -8.984  | 14.872 | 0.158 | 12.93 | 13.59 | 14.29 | 15.36 | 16.18 | 16.87 | 18.16 | -3.604  | 14.079 | 0.095 | 12.44 | 13.29 | 14.08 | 15.13 | 15.88 | 16.49 | 17.63 |
| 10                                     | -8.462  | 15.211 | 0.163 | 13.14 | 13.85 | 14.60 | 15.76 | 16.65 | 17.41 | 18.82 | -3.406  | 14.513 | 0.102 | 12.71 | 13.64 | 14.51 | 15.68 | 16.52 | 17.21 | 18.51 |
| 11                                     | -7.939  | 15.580 | 0.164 | 13.41 | 14.18 | 14.98 | 16.23 | 17.20 | 18.03 | 19.58 | -3.208  | 15.108 | 0.108 | 13.12 | 14.15 | 15.10 | 16.41 | 17.35 | 18.12 | 19.60 |
| 12                                     | -7.417  | 15.976 | 0.159 | 13.74 | 14.56 | 15.43 | 16.77 | 17.83 | 18.73 | 20.44 | -3.010  | 15.753 | 0.114 | 13.57 | 14.70 | 15.75 | 17.19 | 18.22 | 19.08 | 20.70 |
| 13                                     | -6.895  | 16.396 | 0.151 | 14.12 | 15.00 | 15.93 | 17.37 | 18.51 | 19.50 | 21.38 | -2.812  | 16.571 | 0.119 | 14.18 | 15.41 | 16.57 | 18.14 | 19.26 | 20.19 | 21.93 |
| 14                                     | -6.372  | 16.835 | 0.141 | 14.55 | 15.49 | 16.47 | 18.00 | 19.22 | 20.28 | 22.34 | -2.614  | 17.471 | 0.122 | 14.87 | 16.22 | 17.47 | 19.16 | 20.35 | 21.33 | 23.15 |
| 15                                     | -5.850  | 17.286 | 0.131 | 15.00 | 16.00 | 17.03 | 18.63 | 19.91 | 21.03 | 23.25 | -2.416  | 17.970 | 0.123 | 15.24 | 16.66 | 17.97 | 19.71 | 20.92 | 21.90 | 23.70 |
| 16                                     | -5.328  | 17.744 | 0.122 | 15.45 | 16.51 | 17.58 | 19.22 | 20.53 | 21.70 | 24.03 | -2.218  | 18.355 | 0.124 | 15.52 | 17.00 | 18.35 | 20.13 | 21.34 | 22.31 | 24.04 |
| 17                                     | -4.805  | 18.205 | 0.115 | 15.90 | 17.01 | 18.12 | 19.77 | 21.08 | 22.23 | 24.57 | -2.021  | 18.631 | 0.124 | 15.70 | 17.24 | 18.63 | 20.42 | 21.62 | 22.57 | 24.24 |
| 18                                     | -4.283  | 18.665 | 0.108 | 16.34 | 17.50 | 18.63 | 20.26 | 21.51 | 22.60 | 24.79 | -1.823  | 18.859 | 0.125 | 15.84 | 17.44 | 18.86 | 20.66 | 21.86 | 22.78 | 24.39 |
| 19                                     | -3.760  | 19.126 | 0.103 | 16.78 | 17.98 | 19.11 | 20.69 | 21.84 | 22.81 | 24.70 | -1.625  | 19.049 | 0.126 | 15.94 | 17.59 | 19.05 | 20.87 | 22.05 | 22.96 | 24.51 |

Appendix Figure 2: Smoothed waist circumference (WC) and BMI percentiles curves for males and females aged 5-19 years based on a "Reference" population in analytical sample 2 (removing  $\pm 2SD$  BMI z scores)

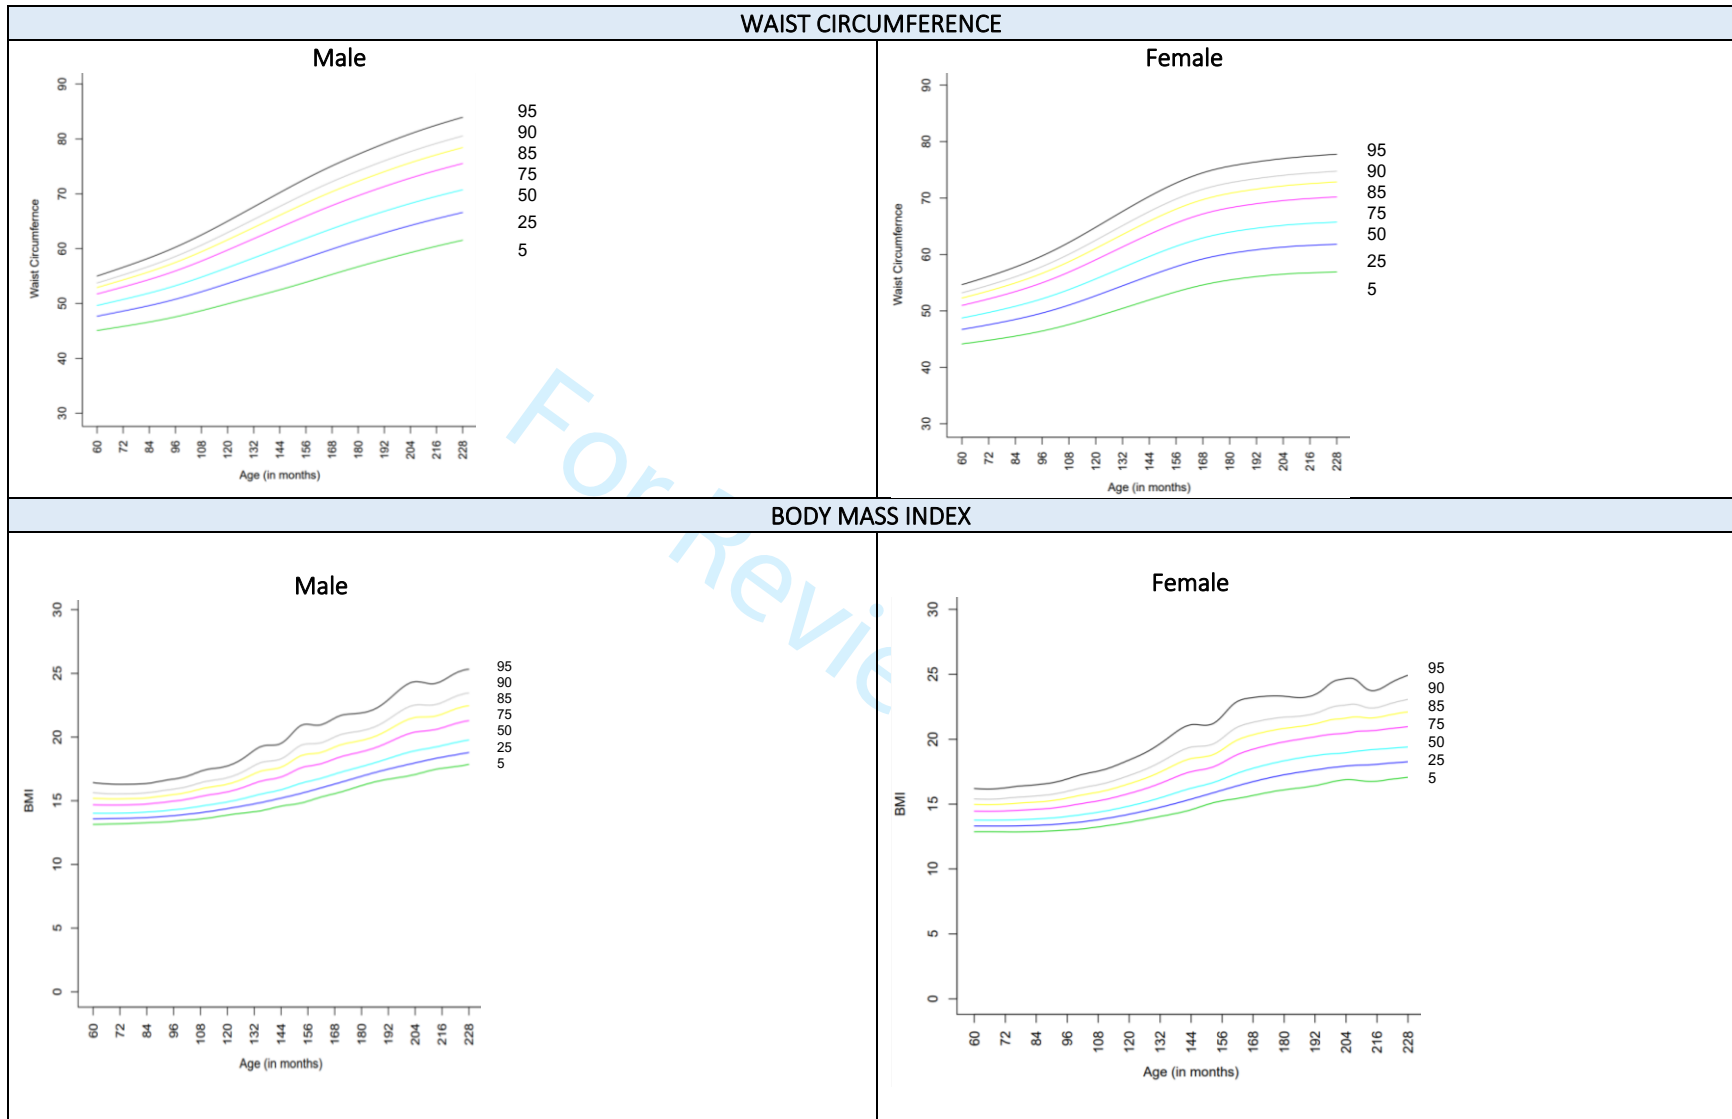

Appendix Table 3: Smoothed percentile values of WC (cm) and BMI by age and sex for males and females aged 5-19 years based on a “Reference” population in analytical sample 3 (removing ±2SD BMI z scores)

| WAIST CIRCUMFERENCE (WC)<br>(N=53,516) |         |        |       |       |       |       |       |       |       |       |         |        |       |       |       |       |       |       |       |       |
|----------------------------------------|---------|--------|-------|-------|-------|-------|-------|-------|-------|-------|---------|--------|-------|-------|-------|-------|-------|-------|-------|-------|
| Age (Years)                            | Males   |        |       |       |       |       |       |       |       |       | Females |        |       |       |       |       |       |       |       |       |
|                                        | L       | M      | S     | P5    | P25   | P50   | P75   | P85   | P90   | P95   | L       | M      | S     | P5    | P25   | P50   | P75   | P85   | P90   | P95   |
| 5                                      | -0.629  | 49.641 | 0.060 | 45.08 | 47.68 | 49.64 | 51.73 | 52.92 | 53.74 | 55.01 | -1.360  | 48.735 | 0.064 | 44.14 | 46.72 | 48.73 | 50.97 | 52.27 | 53.20 | 54.65 |
| 6                                      | -0.680  | 50.743 | 0.064 | 45.83 | 48.63 | 50.74 | 53.02 | 54.31 | 55.22 | 56.61 | -1.331  | 49.714 | 0.068 | 44.79 | 47.55 | 49.71 | 52.12 | 53.53 | 54.54 | 56.12 |
| 7                                      | -0.731  | 51.907 | 0.068 | 46.63 | 49.62 | 51.91 | 54.38 | 55.79 | 56.79 | 58.32 | -1.303  | 50.822 | 0.072 | 45.53 | 48.49 | 50.82 | 53.43 | 54.96 | 56.06 | 57.78 |
| 8                                      | -0.782  | 53.248 | 0.072 | 47.57 | 50.78 | 53.25 | 55.94 | 57.48 | 58.58 | 60.26 | -1.275  | 52.147 | 0.076 | 46.44 | 49.62 | 52.15 | 54.99 | 56.66 | 57.86 | 59.75 |
| 9                                      | -0.833  | 54.819 | 0.076 | 48.70 | 52.15 | 54.82 | 57.75 | 59.45 | 60.65 | 62.51 | -1.246  | 53.777 | 0.080 | 47.58 | 51.03 | 53.78 | 56.88 | 58.72 | 60.04 | 62.13 |
| 10                                     | -0.884  | 56.545 | 0.080 | 49.94 | 53.65 | 56.54 | 59.75 | 61.61 | 62.94 | 65.01 | -1.218  | 55.669 | 0.085 | 48.96 | 52.68 | 55.67 | 59.06 | 61.07 | 62.53 | 64.83 |
| 11                                     | -0.935  | 58.315 | 0.084 | 51.21 | 55.18 | 58.32 | 61.81 | 63.86 | 65.32 | 67.61 | -1.189  | 57.664 | 0.088 | 50.44 | 54.44 | 57.66 | 61.33 | 63.52 | 65.11 | 67.62 |
| 12                                     | -0.986  | 60.092 | 0.088 | 52.50 | 56.73 | 60.09 | 63.87 | 66.10 | 67.70 | 70.22 | -1.161  | 59.632 | 0.091 | 51.94 | 56.20 | 59.63 | 63.56 | 65.90 | 67.60 | 70.30 |
| 13                                     | -1.037  | 61.886 | 0.091 | 53.88 | 58.33 | 61.89 | 65.92 | 68.31 | 70.03 | 72.76 | -1.132  | 61.446 | 0.093 | 53.38 | 57.84 | 61.45 | 65.57 | 68.03 | 69.82 | 72.65 |
| 14                                     | -1.088  | 63.637 | 0.092 | 55.31 | 59.93 | 63.64 | 67.86 | 70.38 | 72.20 | 75.09 | -1.104  | 62.926 | 0.093 | 54.59 | 59.20 | 62.93 | 67.18 | 69.72 | 71.55 | 74.47 |
| 15                                     | -1.139  | 65.281 | 0.093 | 56.71 | 61.45 | 65.28 | 69.66 | 72.28 | 74.18 | 77.20 | -1.075  | 63.947 | 0.093 | 55.47 | 60.17 | 63.95 | 68.26 | 70.83 | 72.69 | 75.64 |
| 16                                     | -1.190  | 66.812 | 0.093 | 58.03 | 62.88 | 66.81 | 71.33 | 74.04 | 76.01 | 79.15 | -1.047  | 64.647 | 0.093 | 56.08 | 60.83 | 64.65 | 68.99 | 71.57 | 73.44 | 76.40 |
| 17                                     | -1.241  | 68.239 | 0.093 | 59.28 | 64.22 | 68.24 | 72.87 | 75.66 | 77.69 | 80.94 | -1.018  | 65.166 | 0.093 | 56.51 | 61.31 | 65.17 | 69.54 | 72.14 | 74.02 | 76.99 |
| 18                                     | -1.292  | 69.544 | 0.093 | 60.45 | 65.46 | 69.54 | 74.27 | 77.12 | 79.20 | 82.53 | -0.989  | 65.503 | 0.094 | 56.75 | 61.61 | 65.50 | 69.92 | 72.54 | 74.43 | 77.42 |
| 19                                     | -1.343  | 70.734 | 0.093 | 61.54 | 66.60 | 70.73 | 75.53 | 78.43 | 80.55 | 83.95 | -0.961  | 65.736 | 0.094 | 56.88 | 61.80 | 65.74 | 70.20 | 72.85 | 74.76 | 77.77 |
| BODY MASS INDEX (BMI)<br>(N= 53,516)   |         |        |       |       |       |       |       |       |       |       |         |        |       |       |       |       |       |       |       |       |
| Age (Years)                            | Males   |        |       |       |       |       |       |       |       |       | Females |        |       |       |       |       |       |       |       |       |
|                                        | L       | M      | S     | P5    | P25   | P50   | P75   | P85   | P90   | P95   | L       | M      | S     | P5    | P25   | P50   | P75   | P85   | P90   | P95   |
| 5                                      | -12.610 | 14.217 | 0.078 | 13.06 | 13.48 | 13.91 | 14.56 | 15.05 | 15.47 | 16.25 | -13.108 | 14.109 | 0.101 | 12.87 | 13.31 | 13.77 | 14.46 | 14.97 | 15.41 | 16.20 |
| 6                                      | -13.935 | 14.284 | 0.083 | 13.18 | 13.59 | 14.00 | 14.63 | 15.10 | 15.50 | 16.22 | -12.900 | 14.128 | 0.103 | 12.86 | 13.31 | 13.78 | 14.48 | 15.00 | 15.45 | 16.25 |
| 7                                      | -14.290 | 14.400 | 0.088 | 13.29 | 13.71 | 14.14 | 14.79 | 15.28 | 15.69 | 16.43 | -12.183 | 14.208 | 0.106 | 12.89 | 13.36 | 13.85 | 14.59 | 15.16 | 15.63 | 16.49 |
| 8                                      | -13.508 | 14.598 | 0.093 | 13.42 | 13.87 | 14.34 | 15.04 | 15.58 | 16.02 | 16.83 | -11.227 | 14.396 | 0.108 | 13.00 | 13.52 | 14.05 | 14.85 | 15.47 | 15.98 | 16.94 |
| 9                                      | -12.121 | 14.889 | 0.098 | 13.59 | 14.10 | 14.62 | 15.41 | 16.01 | 16.51 | 17.42 | -10.421 | 14.717 | 0.110 | 13.24 | 13.80 | 14.37 | 15.25 | 15.92 | 16.49 | 17.54 |
| 10                                     | -12.171 | 15.268 | 0.103 | 13.89 | 14.41 | 14.95 | 15.76 | 16.37 | 16.88 | 17.81 | -9.499  | 15.174 | 0.111 | 13.60 | 14.22 | 14.85 | 15.82 | 16.57 | 17.21 | 18.40 |
| 11                                     | -9.786  | 15.720 | 0.108 | 14.15 | 14.77 | 15.42 | 16.41 | 17.17 | 17.81 | 19.00 | -8.122  | 15.746 | 0.110 | 14.05 | 14.75 | 15.48 | 16.60 | 17.47 | 18.22 | 19.66 |
| 12                                     | -10.019 | 16.245 | 0.113 | 14.59 | 15.23 | 15.90 | 16.92 | 17.70 | 18.36 | 19.59 | -6.765  | 16.405 | 0.108 | 14.57 | 15.38 | 16.22 | 17.50 | 18.51 | 19.39 | 21.12 |
| 13                                     | -8.265  | 16.851 | 0.117 | 14.97 | 15.73 | 16.52 | 17.73 | 18.68 | 19.49 | 21.02 | -7.168  | 17.110 | 0.106 | 15.25 | 16.07 | 16.91 | 18.19 | 19.19 | 20.07 | 21.78 |
| 14                                     | -8.961  | 17.516 | 0.121 | 15.54 | 16.29 | 17.06 | 18.25 | 19.17 | 19.95 | 21.42 | -4.312  | 17.787 | 0.103 | 15.66 | 16.73 | 17.76 | 19.23 | 20.34 | 21.30 | 23.21 |
| 15                                     | -9.860  | 18.199 | 0.125 | 16.15 | 16.86 | 17.60 | 18.73 | 19.61 | 20.34 | 21.71 | -3.465  | 18.340 | 0.100 | 16.10 | 17.26 | 18.34 | 19.79 | 20.83 | 21.69 | 23.31 |
| 16                                     | -9.328  | 18.859 | 0.130 | 16.62 | 17.41 | 18.22 | 19.46 | 20.43 | 21.25 | 22.79 | -3.050  | 18.739 | 0.099 | 16.42 | 17.63 | 18.74 | 20.19 | 21.18 | 21.99 | 23.44 |
| 17                                     | -8.157  | 19.460 | 0.135 | 17.02 | 17.92 | 18.86 | 20.29 | 21.41 | 22.39 | 24.23 | -5.089  | 19.016 | 0.099 | 16.88 | 17.93 | 18.96 | 20.47 | 21.63 | 22.64 | 24.67 |
| 18                                     | -9.101  | 19.994 | 0.142 | 17.55 | 18.43 | 19.34 | 20.73 | 21.81 | 22.74 | 24.48 | -2.578  | 19.223 | 0.100 | 16.77 | 18.07 | 19.22 | 20.69 | 21.67 | 22.44 | 23.78 |
| 19                                     | -8.566  | 20.486 | 0.149 | 17.92 | 18.90 | 19.92 | 21.49 | 22.72 | 23.78 | 25.81 | -3.796  | 19.407 | 0.101 | 17.06 | 18.26 | 19.40 | 20.96 | 22.11 | 23.07 | 24.94 |

Appendix Figure 3: Comparison of sex wise data distribution of WC and BMI percentiles values with 95 % confidence interval in Samples 1, 2 and 3

**50<sup>th</sup> and 90<sup>th</sup> percentiles for Waist Circumference by age and sex for all eligible participants and after excluding  $\pm 2sd$  and  $\pm 3sd$**

**Males**

**Females**

**50th percentiles**

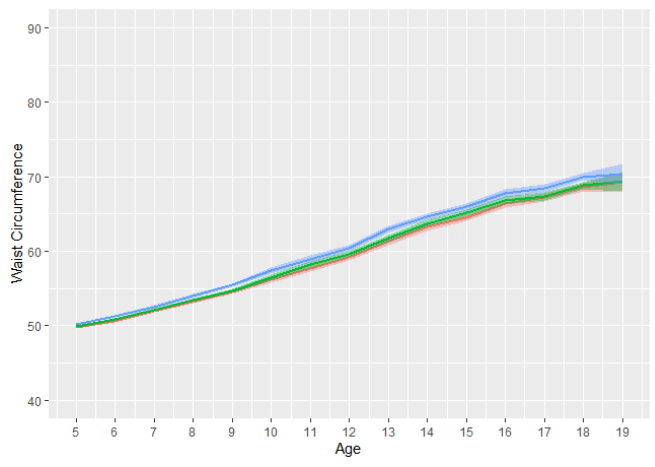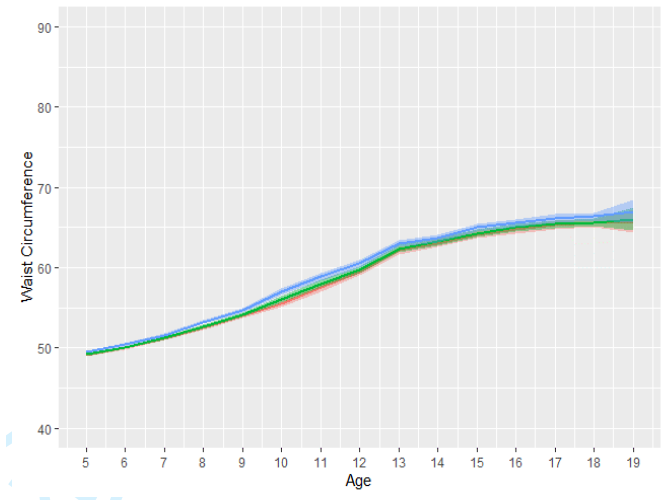

**90th percentiles**

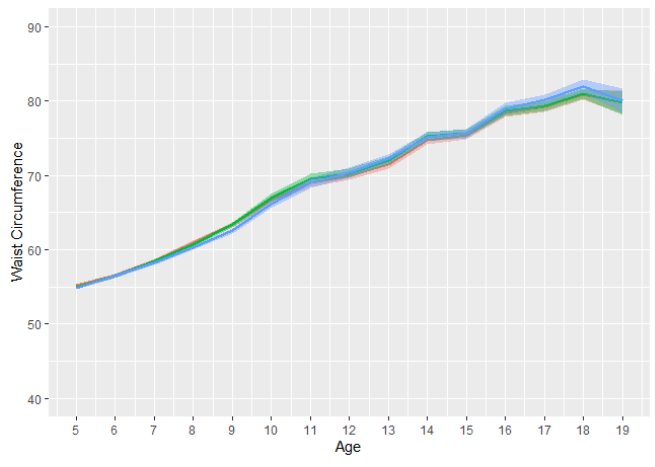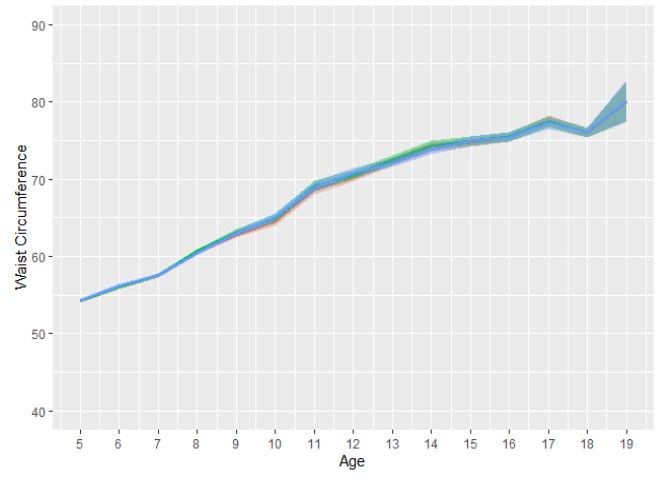

50th and 95th percentile with 95%CI for BMI by age and sex based for all eligible participants and after excluding  $\pm 2sd$  and  $\pm 3sd$

Males

Females

50th percentiles

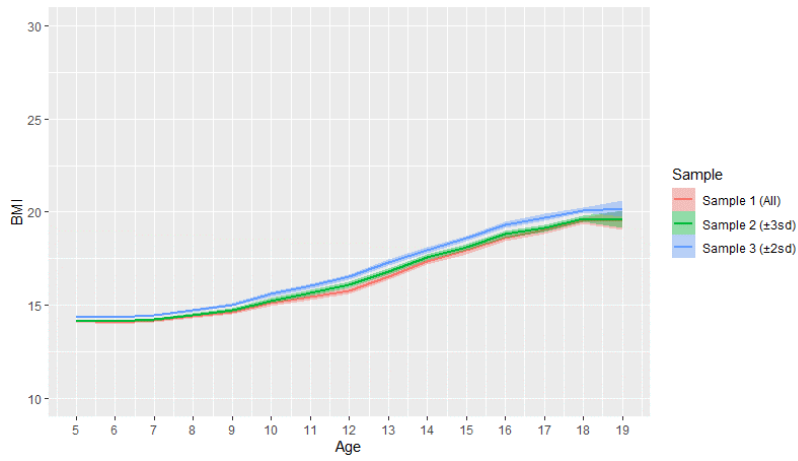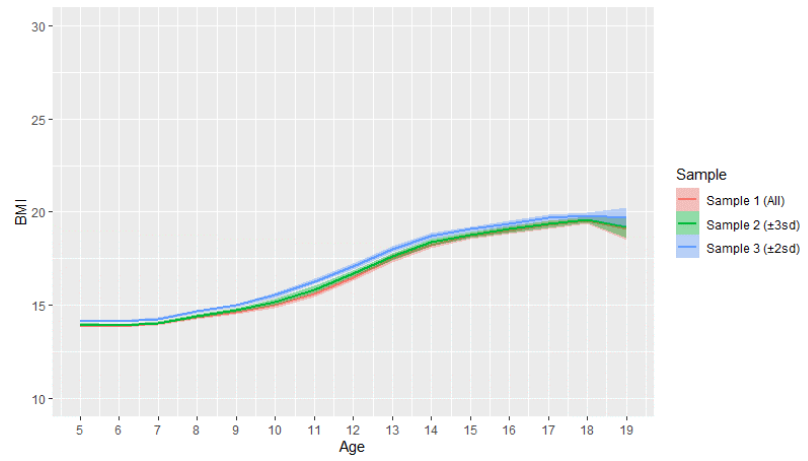

95th percentiles

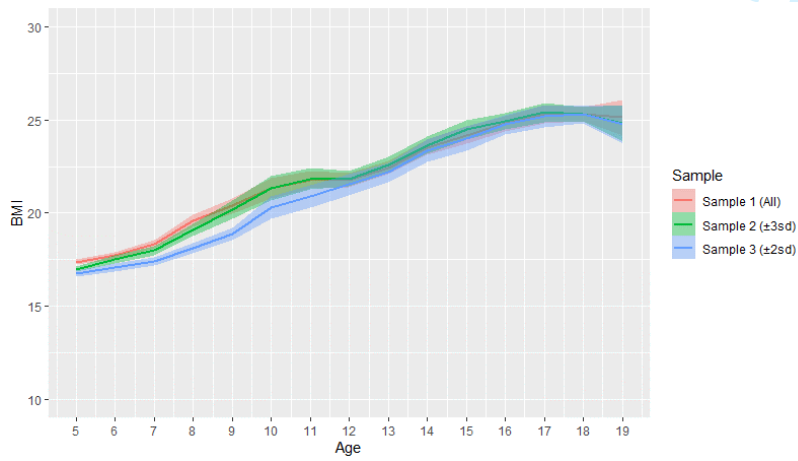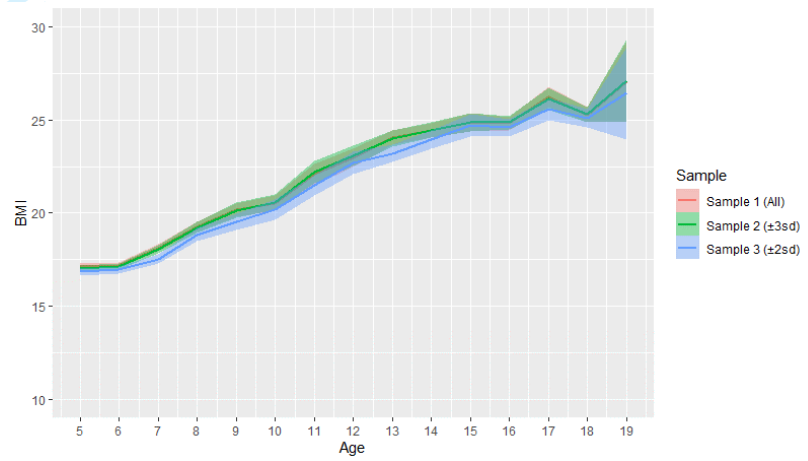



Appendix Table 4: Comparison of smoothed 50<sup>th</sup> and 90<sup>th</sup> percentiles of Waist circumference for Boys and Girls at age 10, 14 and 18 years

| Age group    | 10 years |                    |                 |                       |                       |                     | 14 years            |                    |                 |                       |                       |                     | 18 years            |                    |                 |                       |                       |                     |                     |
|--------------|----------|--------------------|-----------------|-----------------------|-----------------------|---------------------|---------------------|--------------------|-----------------|-----------------------|-----------------------|---------------------|---------------------|--------------------|-----------------|-----------------------|-----------------------|---------------------|---------------------|
|              | Country  | India <sup>1</sup> | US <sup>2</sup> | Malaysia <sup>3</sup> | Pakistan <sup>4</sup> | Turkey <sup>5</sup> | Poland <sup>6</sup> | India <sup>1</sup> | US <sup>2</sup> | Malaysia <sup>3</sup> | Pakistan <sup>4</sup> | Turkey <sup>5</sup> | Poland <sup>6</sup> | India <sup>1</sup> | US <sup>2</sup> | Malaysia <sup>3</sup> | Pakistan <sup>4</sup> | Turkey <sup>5</sup> | Poland <sup>6</sup> |
| <b>Boys</b>  |          |                    |                 |                       |                       |                     |                     |                    |                 |                       |                       |                     |                     |                    |                 |                       |                       |                     |                     |
| 50th         | 55.1     | 65.9               | 58.7            | 60.3                  | 60.5                  | 61.4                | 61.4                | 75.0               | 67.5            | NA                    | 68.9                  | 69.1                | 67.8                | 84.1               | NA              | NA                    | NA                    | NA                  | 76.4                |
| 90th         | 62.6     | 83.3               | 74.5            | 72.0                  | 69.5                  | 72.9                | 71.0                | 99.2               | 86.4            | NA                    | 79.5                  | 81.0                | 78.5                | 115.1              | NA              | NA                    | NA                    | NA                  | 86.5                |
| <b>Girls</b> |          |                    |                 |                       |                       |                     |                     |                    |                 |                       |                       |                     |                     |                    |                 |                       |                       |                     |                     |
| 50th         | 54.4     | 66.1               | 56.7            | 61.0                  | 58.2                  | 59.1                | 61.5                | 75.4               | 65.6            | NA                    | 64.7                  | 66.2                | 64.6                | 84.7               | NA              | NA                    | NA                    | NA                  | 69.0                |
| 90th         | 61.9     | 84.5               | 69.8            | 74.0                  | 66.3                  | 69.5                | 71.2                | 100.5              | 80.1            | NA                    | 73.3                  | 77.9                | 74.4                | 116.5              | NA              | NA                    | NA                    | NA                  | 78.2                |

Study year: <sup>1</sup>2016-2018; <sup>2</sup>2009-2014; <sup>3</sup>2008-2009; <sup>4</sup>2009-2010; <sup>5</sup>2005; <sup>6</sup>2002-2005  
 NA-Not available

Appendix Table 5: Comparison of smoothed 50<sup>th</sup> and 90<sup>th</sup> percentiles of Body mass index for Boys and Girls at age 10, 14 and 18 years

| Age group    | 10 years |                    |                 |                       |                       |                     | 14 years            |                    |                 |                       |                       |                     | 18 years            |                    |                 |                       |                       |                     |                     |
|--------------|----------|--------------------|-----------------|-----------------------|-----------------------|---------------------|---------------------|--------------------|-----------------|-----------------------|-----------------------|---------------------|---------------------|--------------------|-----------------|-----------------------|-----------------------|---------------------|---------------------|
|              | Country  | India <sup>1</sup> | US <sup>2</sup> | Malaysia <sup>3</sup> | Pakistan <sup>4</sup> | Turkey <sup>5</sup> | Poland <sup>6</sup> | India <sup>1</sup> | US <sup>2</sup> | Malaysia <sup>3</sup> | Pakistan <sup>4</sup> | Turkey <sup>5</sup> | Poland <sup>6</sup> | India <sup>1</sup> | US <sup>2</sup> | Malaysia <sup>3</sup> | Pakistan <sup>4</sup> | Turkey <sup>5</sup> | Poland <sup>6</sup> |
| <b>Boys</b>  |          |                    |                 |                       |                       |                     |                     |                    |                 |                       |                       |                     |                     |                    |                 |                       |                       |                     |                     |
| 50th         | 14.5     | 16.4               | 16.6            | 14.5                  | 17.7                  | 17.1                | 16.3                | 19.0               | 18.6            | NA                    | 19.7                  | 19.2                | 18.7                | 21.7               | NA              | NA                    | 21.7                  | 21.8                |                     |
| 90th         | 17.1     | 19.2               | 23.2            | 19.5                  | 21.1                  | 21.7                | 19.9                | 22.8               | 25.6            | NA                    | 23.7                  | 24.1                | 22.7                | 26.0               | NA              | NA                    | 25.8                  | 26.4                |                     |
| <b>Girls</b> |          |                    |                 |                       |                       |                     |                     |                    |                 |                       |                       |                     |                     |                    |                 |                       |                       |                     |                     |
| 50th         | 14.5     | 16.6               | 16.3            | 16.2                  | 17.5                  | 16.9                | 17.2                | 19.6               | 18.4            | NA                    | 20.2                  | 19.4                | 18.9                | 21.3               | NA              | NA                    | 21.6                  | 20.7                |                     |
| 90th         | 17.3     | 19.9               | 22.0            | 21.4                  | 20.9                  | 21.2                | 21.2                | 23.8               | 23.6            | NA                    | 25.6                  | 24.1                | 22.9                | 26.0               | NA              | NA                    | 25.2                  | 24.9                |                     |

Study year: <sup>1</sup>2016-2018; <sup>2</sup>2007; <sup>3</sup>2011; <sup>4</sup>2009-2010; <sup>5</sup>2005; <sup>6</sup>2007-2009  
 NA-Not available

Review Only
